# Supplementary material
Source: Springer Nature journal article supplement (https://www.springermedizin.de/resource/supplementary/12872_2009_288_MOESM8_ESM.pdf/9429622)

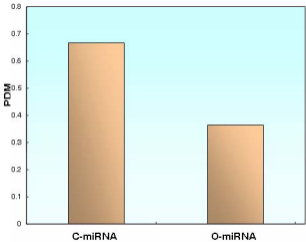

Supplement: MOESM8 [file 9429622]
